# Supplementary material for: Photophysiological responses of bottom sea-ice algae to fjord dynamics and rapid freshening
Source: Frontiers journal article supplement (doi:10.3389/fmars.2023.1221639), 2023-12-13
Supplement: Data_Sheet_1.PDF [file Data_Sheet_1.PDF]

## Supplementary Material

### 1 Supplementary Figures

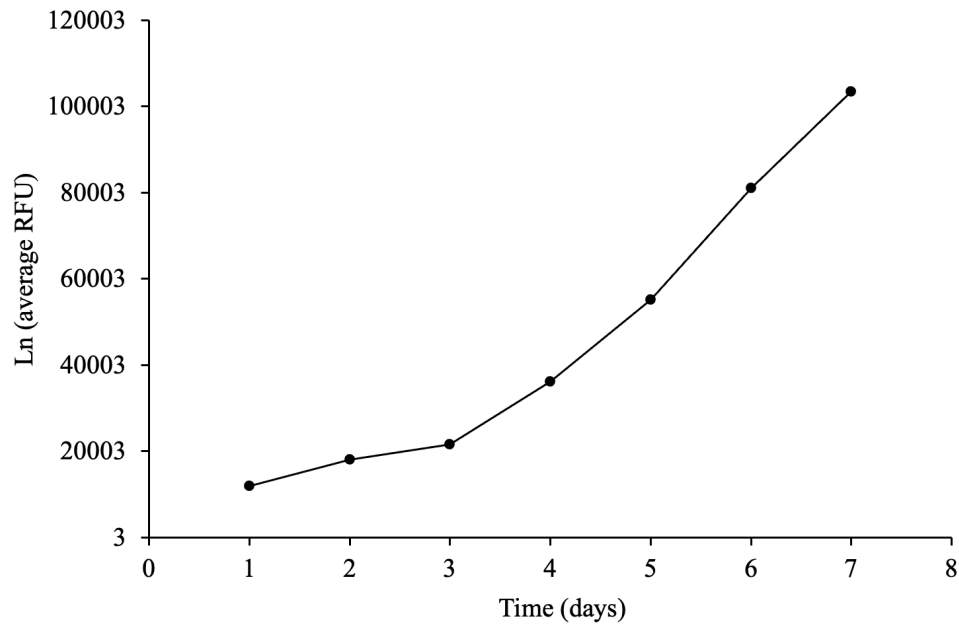

**Figure 1:** Growth curve of a VM2 cultured ice algal community (**Definition Sections 1, 2.1.1 and 2.2.1**). Average ( $n = 5$ ) measurements. RFU stands for raw fluorescence unit. The specific growth rate ( $\mu_t$ ) was  $0.36 \text{ d}^{-1}$  and was calculated using the following equation applied by Zhang et al. (1999):  $\mu_t = \ln(Nt2/Nt1)/(t2 - t1)$ , where  $N_{t1}$  and  $N_{t2}$  represent algal Chl  $a$  determined by the average raw fluorescence of the samples at time  $t1$  and  $t2$ , respectively.

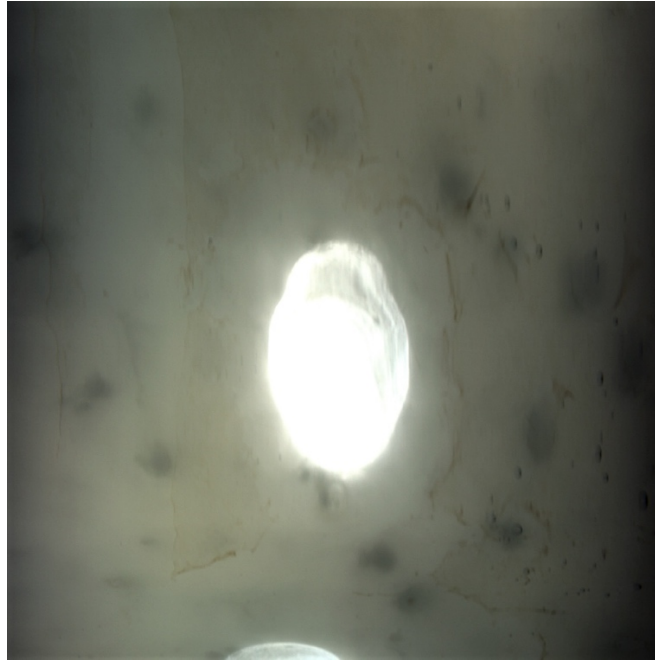

**Figure 2:** Picture from UHI (**Definitions Section 2.1.2**) taken by Janina Osanen, showing the lack of clearly defined skeletal layer at TF1.

## 2 Supplementary Tables

**Table 1:** Average ( $n = 3$ ) relative abundance of dead pennate diatoms (i.e., empty frustules) to the community composition with respective standard deviation for the VM2 cultured ice algal community (**Definitions Sections 1, 2.1.1 and 2.2.1**) after growing for 4 h, 24 h and 168 h in two salinity treatments, 33 (control) and 10 (lowered salinity).

|                                 |              | <b>33</b> | <b>10</b>  |
|---------------------------------|--------------|-----------|------------|
| <b>Dead pennate diatoms (%)</b> | <b>4 h</b>   | $1 \pm 1$ | $8 \pm 5$  |
|                                 | <b>24 h</b>  | $3 \pm 1$ | $10 \pm 5$ |
|                                 | <b>168 h</b> | $1 \pm 1$ | $9 \pm 4$  |
